# Supplementary material for: Microwave assisted organocatalytic synthesis of 5-hydroxymethyl furfural in a monophasic green solvent system
Source: Royal Society of Chemistry journal article supplement (doi:10.1039/c4ra03137g), 2014-01-01
Supplement: c4ra03137g1.pdf [file c4ra03137g1.pdf]

## Supporting Information

# Microwave assisted organocatalytic synthesis of 5-hydroxymethyl furfural in a monophasic green solvent system

Hitesh Pawar<sup>a</sup> and Arvind Lali<sup>\*a,b</sup>

<sup>a</sup>DBT-ICT Centre for Energy Biosciences, Institute of Chemical Technology, Matunga, Mumbai 400 019, India  
Fax: 91 22 3361 1020; Tel: 91 22 3361 2302;  
E-mail: arvindmlali@gmail.com

## 1 Purification procedure

### 1.1 Purification of HMF by silica column

Solvent distilled crude HMF was purified before structural characterization by silica column chromatography. Silica gel (60-120 mesh), in about three times weight of HMF, was poured in the solution of crude HMF in 5 volumes of ethyl acetate, and ethyl acetate removed by vacuum distillation. The silica gel slurry was dried at 50°C in a vacuum oven. The silica adsorbed HMF solid was loaded on top of a 30cm long 10mm diameter silica gel column. The column was eluted by 50:50 hexane-ethyl acetate mixture and the eluted fractions analyzed by TLC. Fractions containing HMF were pooled and distilled under vacuum. The resulting faint to dark yellow color oil (0.625 gm, 89.29 % yield) was used for structural characterization as HMF.

### Material Balance

|                               | Fructose    | HMF           | Molar Step Yield, % | Overall Molar Yield, % | Purity, w/w%   |
|-------------------------------|-------------|---------------|---------------------|------------------------|----------------|
| <b>Initial</b>                | <b>1.0g</b> | <b>--</b>     | <b>--</b>           |                        | <b>--</b>      |
| <b>Crude reaction Mixture</b> | <b>0.0g</b> | <b>0.64g</b>  | <b>91.0</b>         |                        |                |
| <b>Ethyl Acetate Extract</b>  | <b>0.0g</b> | <b>0.63g</b>  | <b>98.0</b>         |                        |                |
| <b>Column Eluate</b>          | <b>0.0g</b> | <b>0.625g</b> | <b>98.0</b>         |                        |                |
| <b>Product after drying</b>   | <b>0.0g</b> | <b>0.625g</b> | <b>100.0%</b>       | <b>88%</b>             | <b>&gt;99%</b> |

## 2 HPLC analysis of HMF

### 2.2 HPLC chromatogram of reaction mass

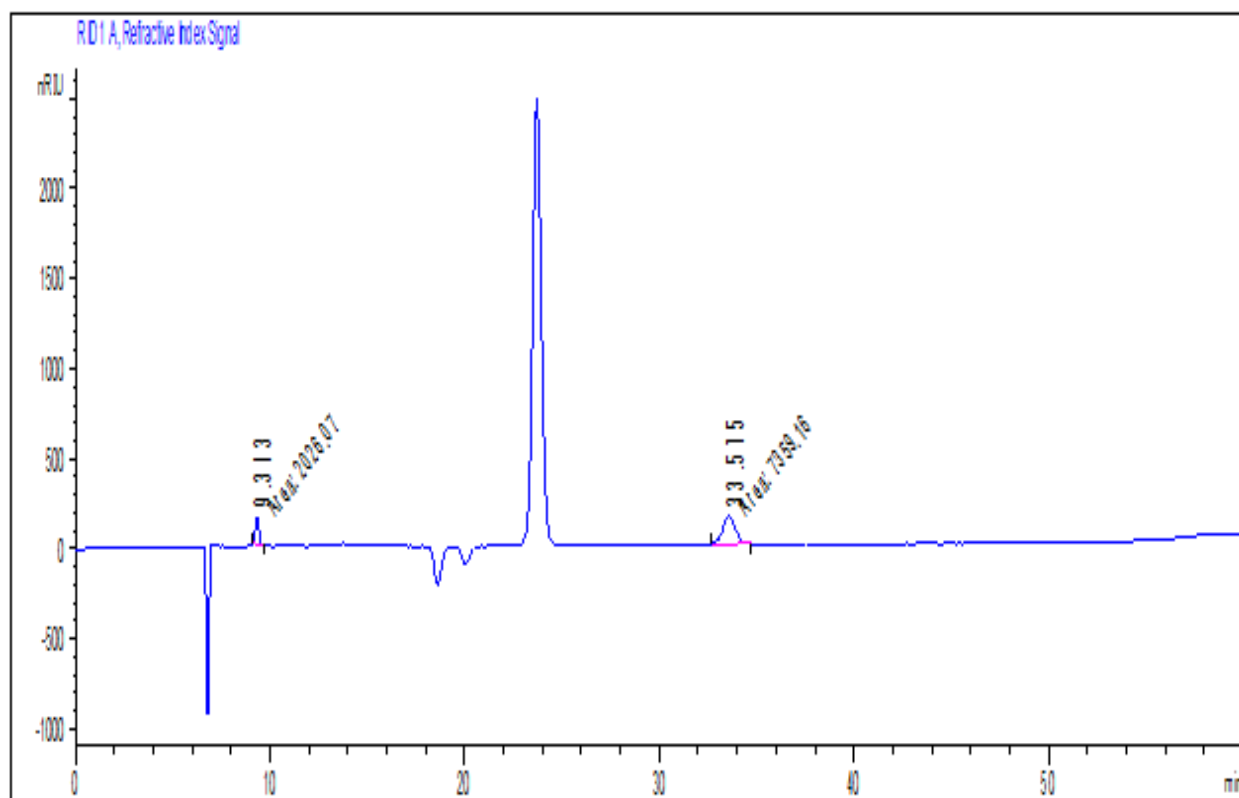

**Fig S1:** HPLC chromatogram of the IPA reaction mass after 90s.

## 2.1 HPLC chromatogram of HMF

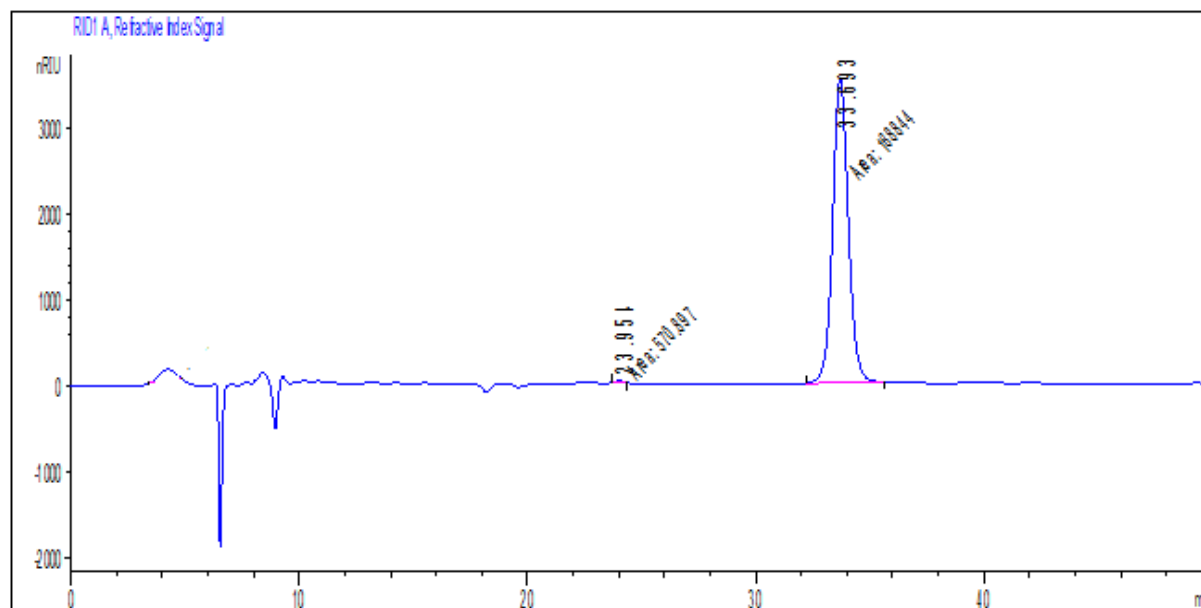

**Fig S2.**HPLC chromatogram of HMF before purification (after distillation of solvent)

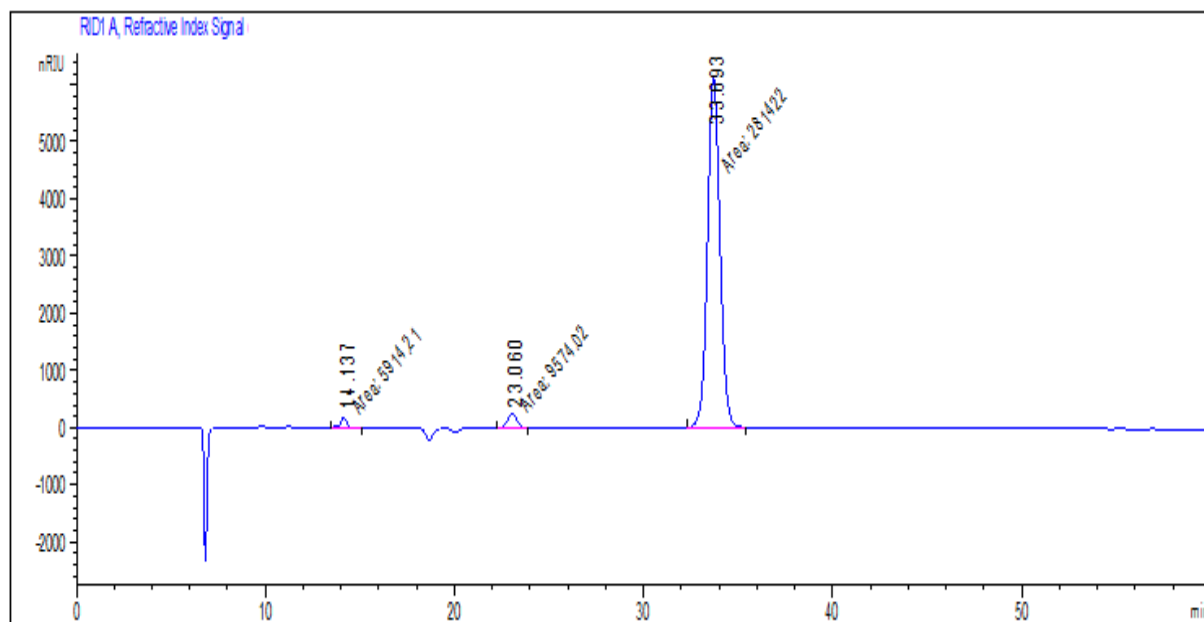

**Fig S3.**HPLC chromatogram of HMF after purification

### 3. Characterization of HMF

#### 3.1. ATR- FTIR analysis of HMF

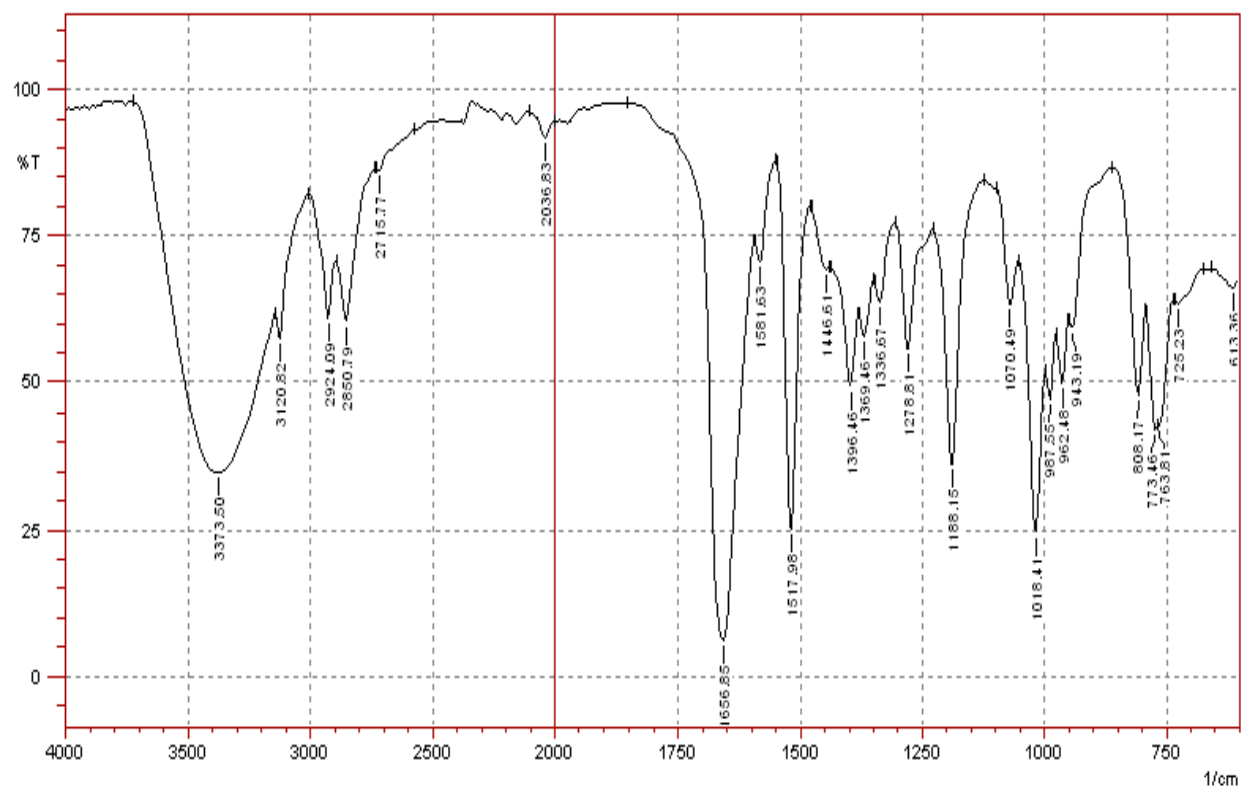

**Fig S4:** ATR –FTIR of HMF

### 3.2. GC-MS analysis of HMF

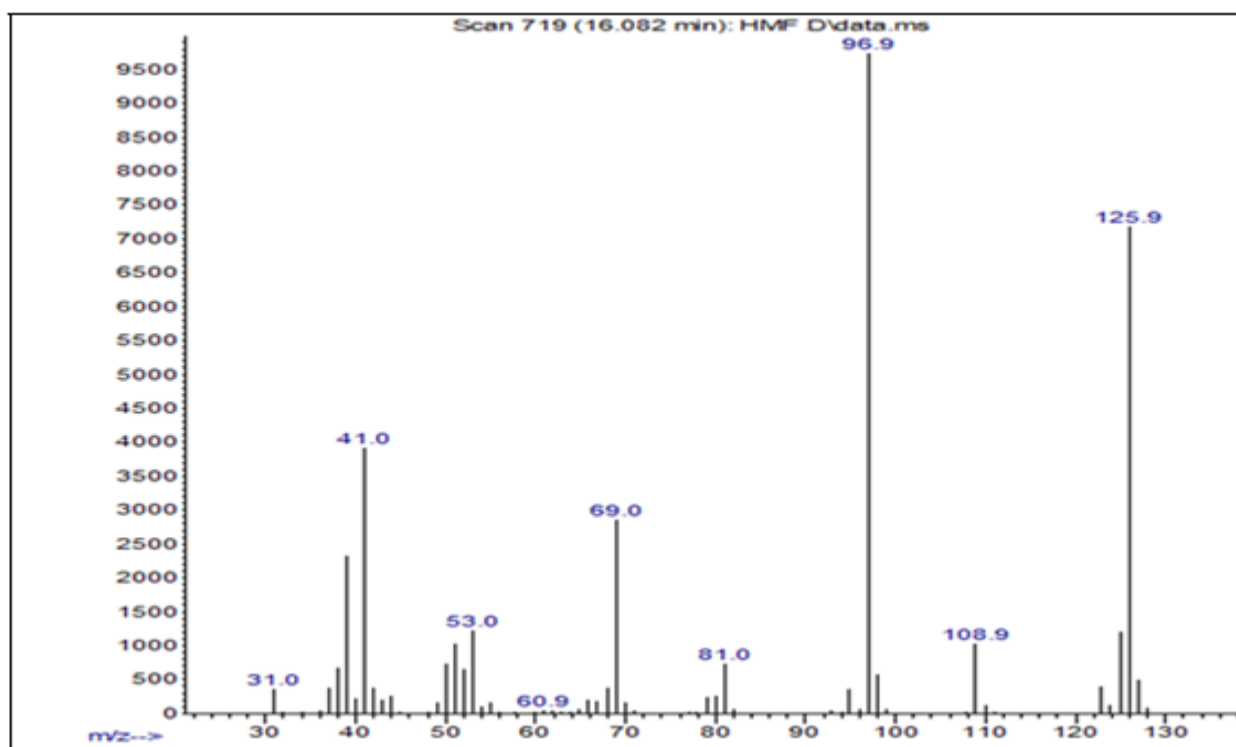

**Fig S5:** GC-MS mass chromatogram of purified HMF

### 3.3. LC-MS and MS-MS analysis of HMF

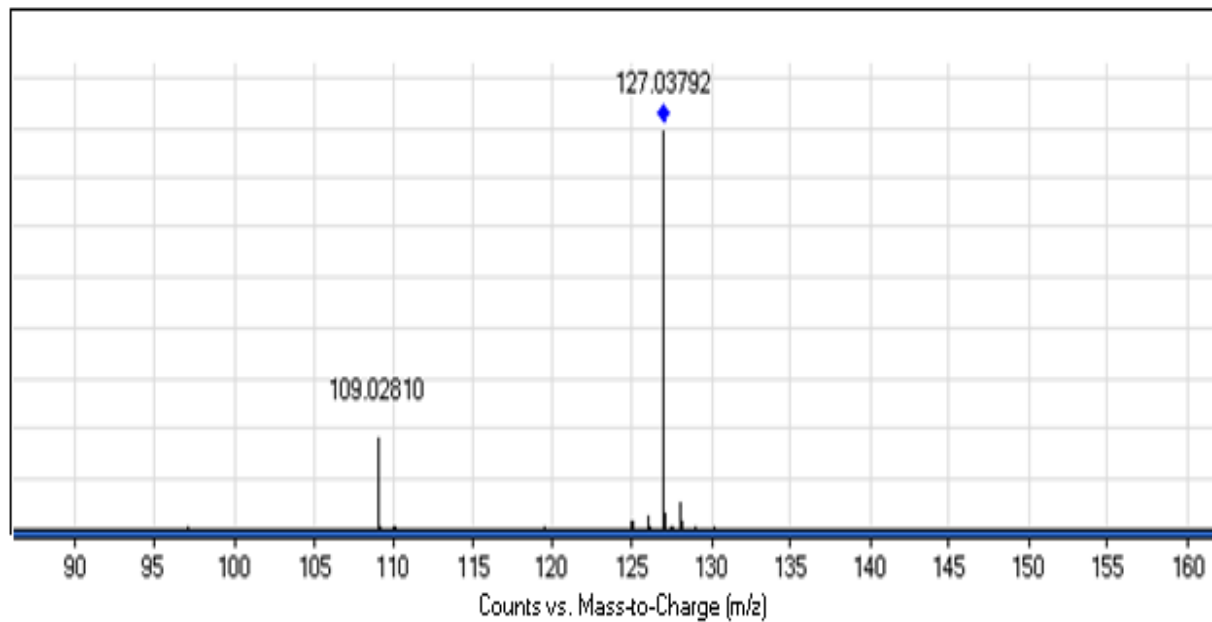

**Fig S6:** LC-MS mass chromatogram of purified HMF

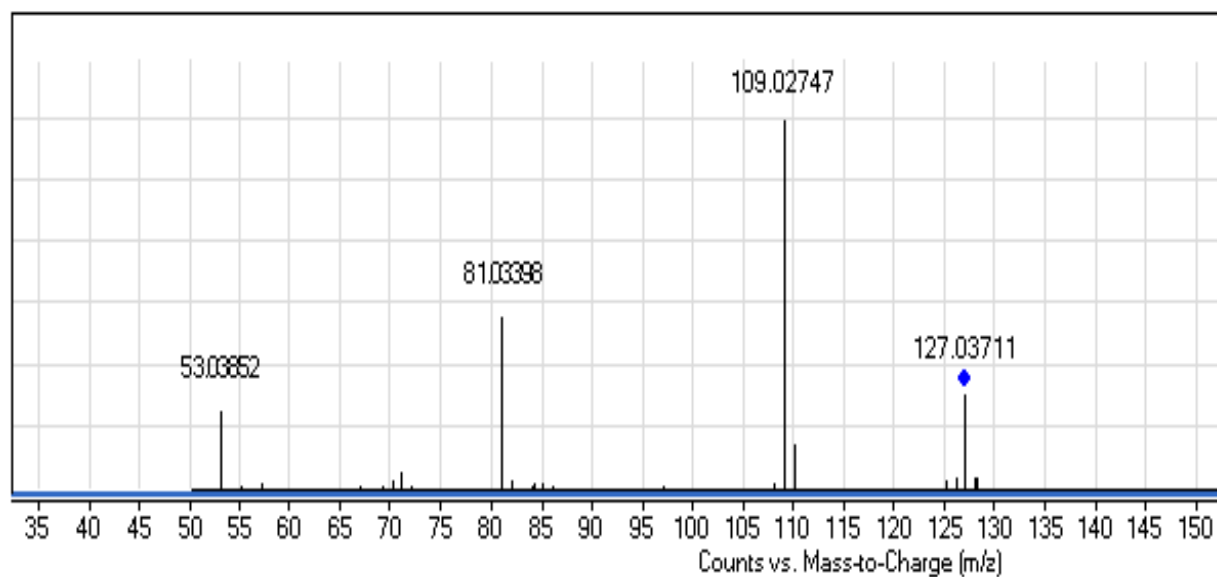

**Fig S7:** MS-MS mass chromatogram of purified HMF

### 3.4. $^1\text{H}$ NMR analysis of HMF

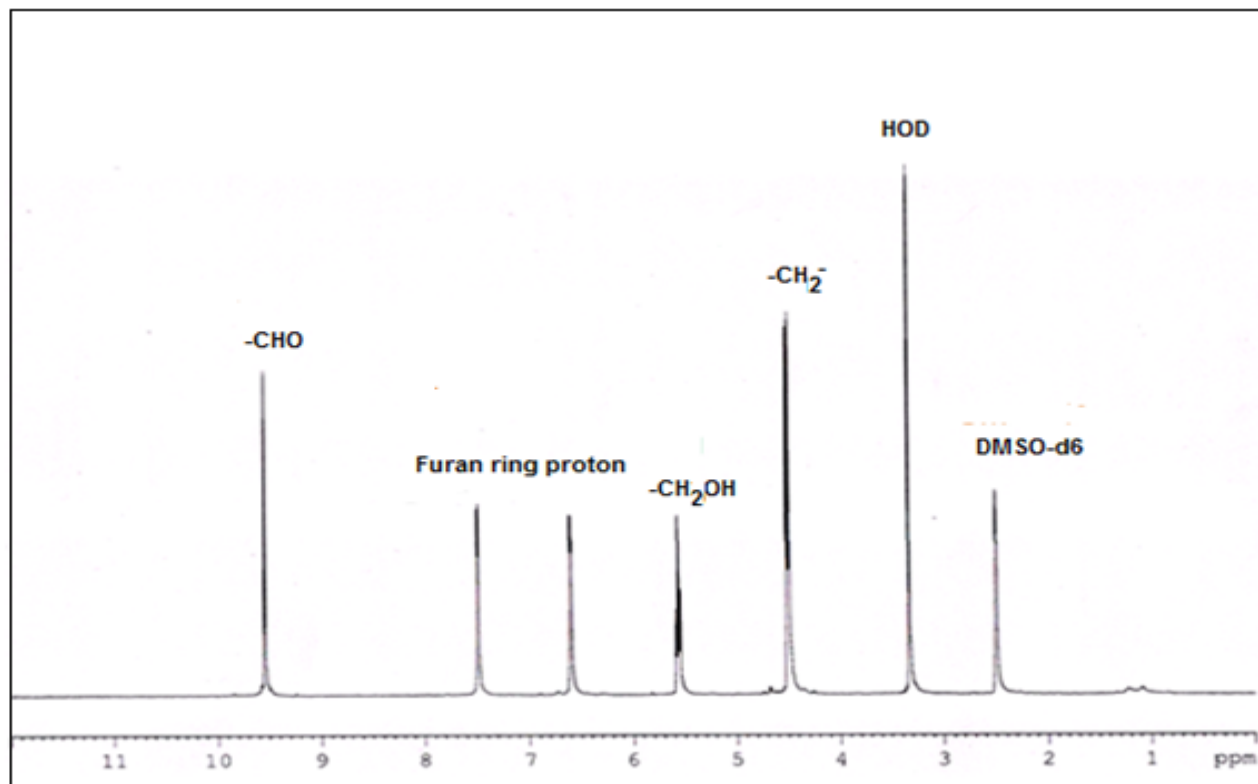

**Fig S8:**  $^1\text{H}$  NMR of purified HMF
